# Supplementary material for: Incorporating acoustic objectives into Forest Management Planning when sensitive bird species are relevant
Source: PeerJ. 2019 May 16;7:e6922. doi: 10.7717/peerj.6922 (PMC6526013; doi:10.7717/peerj.6922)
Supplement: Supplemental Information 4 — Landscape, orographical and forest data at each stand’s centroid point in Scenario 1. [file peerj-07-6922-s004.xlsx]

## Sheet: Scenario1
ID	AWMSI	MPFD	ED	MPS	NumP	DIST	ARD	AREA	SUPF	ELEV	SLOPE	ASPECT	G	N	VOL
1	3.52	1.13	268.72	3.02	26	120.93	192.07	66.96	18.7661	1738.57	43.9069	268.487	14.85	197.47	19693.9
2	3.1	1.14	230.77	3.41	23	156.54	177.34	68.67	63.6573	1446.85	35.709	205.758	33.8198	507.787	24050
3	3.61	1.17	252.16	4.13	19	169.49	180.19	68.35	73.535	1399.99	25.8984	281.733	19.91	260.09	27365.1
4	3.21	1.16	231.39	4.14	19	120.03	168.12	69.67	53.8073	1332.38	39.7075	274.119	18.17	278.085	25842
5	3.33	1.17	224.66	3.74	21	107.99	167.08	69.78	20.6478	1606.16	39.9685	296.965	35.917	541.96	24516.2
6	3.16	1.16	245.7	3.42	23	107.33	165.55	69.94	27.5958	1659.75	27.8628	185.886	20.275	261.595	24115.8
7	3.63	1.14	295.86	1.96	40	114.36	220.03	63.34	12.345	1448.06	52.1076	355.345	13.24	314.825	21147.3
8	3.28	1.19	211.06	5.61	14	126.32	178.41	68.55	30.7421	1412.32	10.2941	286.515	20.92	251.285	10417.1
9	3.41	1.14	222.58	3.57	22	155.48	180.8	68.28	10.8249	1408.8	6.80037	343.711	19.22	189.45	73644.5
10	3.3	1.16	222.92	4.13	19	150.14	178.32	68.56	30.154	1398.98	21.6842	206.13	23.5	269.21	11237.7
11	3.78	1.13	255.28	2.91	27	146.54	223.48	62.86	16.5207	1660.35	25.47	211.381	21.885	305.57	19868.4
12	3.32	1.19	252.8	4.62	17	150.86	186.1	67.67	11.5726	1497.27	23.3737	99.8717	20.175	231.155	101034
13	3.44	1.14	260.79	3.14	25	149.44	174.81	68.95	39.7119	1478.94	32.4688	63.6913	18.29	218.625	24639.6
14	3.1	1.19	236.75	4.91	16	165.91	181.42	68.21	38.1014	1486.62	44.1762	13.8307	14.355	275.355	9651.72
15	3.57	1.14	221.76	3.93	20	123.18	170.29	69.44	46.8254	1297.88	17.2107	60.2758	19.24	280.35	40468.6
16	3.32	1.16	213	4.61	17	170.08	186.01	67.68	27.0303	1343.85	10.2313	319.402	22.64	260.91	22856.6
17	3.51	1.16	270.02	3.57	22	140.79	204.12	65.46	19.9705	1459.12	41.1565	310.016	21.15	261.115	41972.2
18	3.19	1.16	197.96	4.91	16	146.23	161.56	70.35	25.5893	1628.3	28.6387	276.671	18.49	277.955	38833.8
19	3.61	1.16	246.91	3.57	22	147.73	171.78	69.28	40.0311	1673.42	25.0854	251.76	16.18	228.935	16775.1
20	3.52	1.16	255.89	3.57	22	130.4	167.37	69.75	17.5665	1762.46	35.3135	278.442	14.71	286.595	64061.8
21	3.27	1.14	247.33	2.8	28	222.93	298.97	50.47	31.4273	1662.26	22.7088	345.17	17.825	284.345	14184.3
22	3.16	1.16	230.76	3.57	22	147.17	172.98	69.15	24.8809	1540.8	20.9436	255.493	15.88	397.65	6289.16
23	2.96	1.14	244.78	3.02	26	140.05	178.86	68.5	11.3451	1581.25	30.3161	279.671	26.67	172.735	94173.8
24	3.37	1.17	220.65	4.13	19	146.35	171.22	69.34	24.3383	1503.61	23.0702	106.209	22.86	163.25	38413.3
25	3.25	1.19	249.81	4.36	18	168.21	183.69	67.95	35.1956	1634.4	45.1218	110.271	43.316	784.186	22492.3
26	3.48	1.2	233.83	5.24	15	121.95	159.98	70.51	57.3294	1704.14	30.4966	201.722	20.085	290.375	26729.5
27	3.11	1.17	203.84	5.24	15	118.98	155.23	70.98	25.598	1752.94	31.286	178.605	20.97	300.59	27786.5
28	3.27	1.15	248.6	2.91	27	152.7	177.61	68.64	35.4172	1436.04	27.8605	268.724	20.25	225.79	29470.8
29	3.06	1.16	217.54	4.13	19	163.84	181.95	68.15	33.7683	1524.34	49.0747	330.955	43.5904	590.969	27030.1
30	3.19	1.14	233.7	3.57	22	162.83	175.53	68.87	17.3672	1511.99	24.1987	6.92318	25.305	354.11	32181.8
31	3.25	1.15	237.5	3.14	25	134.9	172.33	69.22	33.6822	1517.17	38.4234	44.1456	21.39	323.41	27038.2
